# Supplementary material for: A novel sea surface pCO 2 -product for the global coastal ocean resolving trends over 1982–2020
Source: Copernicus journal article supplement (doi:10.5194/essd-16-421-2024), 2024-01-19
Supplement: Supplementary file 1 [file essd-16-421-2024-supplement.pdf]

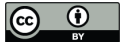

*Supplement of*

## **A novel sea surface pCO<sub>2</sub>-product for the global coastal ocean resolving trends over 1982–2020**

**Alizée Roobaert et al.**

*Correspondence to:* Alizée Roobaert ([alizee.roobaert@vliz.be](mailto:alizee.roobaert@vliz.be))

The copyright of individual parts of the supplement might differ from the article licence.

**Table S1: Bias (mean of the residuals between the reconstructed coastal pCO<sub>2</sub>-product and SOCAT\_a, in  $\mu\text{atm}$ ), Root Mean Square Error (RMSE,  $\mu\text{atm}$ ) and coefficient of determination ( $r^2$ ) calculated for each year. The number of grid cells used for the comparison is also provided.**

|            | bias<br>( $\mu\text{atm}$ ) | RMSE<br>( $\mu\text{atm}$ ) | $r^2$ | cells  |
|------------|-----------------------------|-----------------------------|-------|--------|
| 1982-12020 | 0                           | 29                          | 0.7   | 472134 |
| 1982       | 1                           | 20                          | 0.7   | 568    |
| 1983       | 5                           | 15                          | 0.7   | 209    |
| 1984       | -1                          | 13                          | 0.7   | 341    |
| 1985       | 5                           | 18                          | 0.4   | 192    |
| 1986       | -2                          | 11                          | 0.8   | 310    |
| 1987       | -6                          | 31                          | 0.4   | 456    |
| 1988       | -1                          | 27                          | 0.6   | 323    |
| 1989       | -2                          | 42                          | 0.5   | 453    |
| 1990       | 2                           | 26                          | 0.2   | 181    |
| 1991       | 0                           | 17                          | 0.8   | 1094   |
| 1992       | 2                           | 16                          | 0.7   | 1176   |
| 1993       | 4                           | 30                          | 0.6   | 2067   |
| 1994       | 0                           | 25                          | 0.6   | 2939   |
| 1995       | 0                           | 24                          | 0.8   | 6220   |
| 1996       | 0                           | 28                          | 0.7   | 5130   |
| 1997       | 3                           | 32                          | 0.8   | 4928   |
| 1998       | 1                           | 28                          | 0.7   | 5259   |
| 1999       | 0                           | 31                          | 0.8   | 5183   |
| 2000       | -2                          | 32                          | 0.7   | 6289   |
| 2001       | -1                          | 33                          | 0.7   | 7055   |
| 2002       | 3                           | 26                          | 0.7   | 8833   |
| 2003       | -3                          | 24                          | 0.8   | 8772   |
| 2004       | -1                          | 26                          | 0.8   | 12276  |
| 2005       | -1                          | 25                          | 0.7   | 14980  |
| 2006       | 0                           | 28                          | 0.7   | 22512  |
| 2007       | 2                           | 29                          | 0.7   | 21724  |
| 2008       | 2                           | 26                          | 0.8   | 19784  |
| 2009       | 1                           | 30                          | 0.7   | 18313  |
| 2010       | 0                           | 28                          | 0.7   | 21149  |
| 2011       | 0                           | 34                          | 0.7   | 27382  |
| 2012       | -1                          | 31                          | 0.7   | 24474  |
| 2013       | -1                          | 30                          | 0.7   | 21674  |
| 2014       | 0                           | 32                          | 0.7   | 27817  |
| 2015       | 0                           | 30                          | 0.7   | 28386  |
| 2016       | 1                           | 25                          | 0.8   | 29319  |
| 2017       | 2                           | 26                          | 0.8   | 34210  |
| 2018       | 1                           | 28                          | 0.7   | 30488  |
| 2019       | -1                          | 30                          | 0.7   | 29283  |
| 2020       | -2                          | 30                          | 0.8   | 20367  |

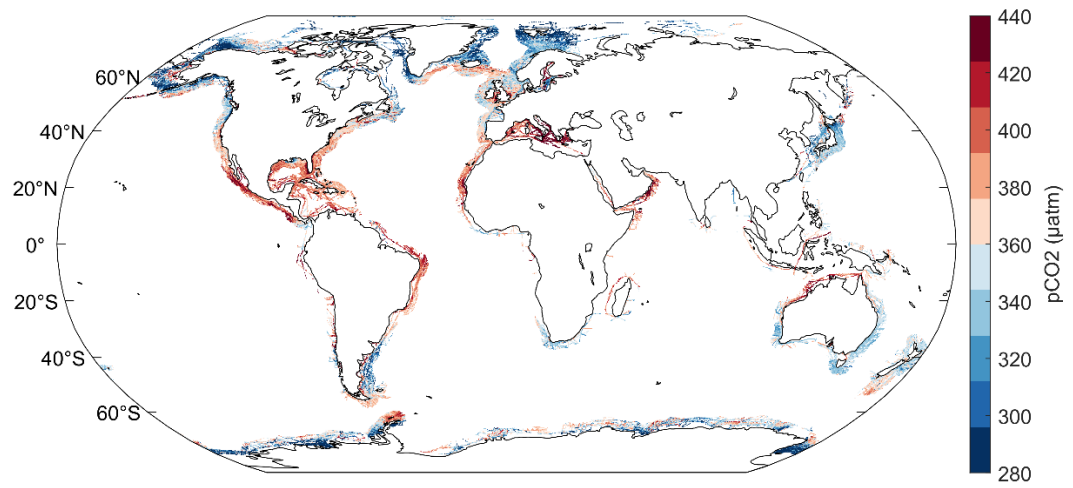

**Figure S1. Global map of the climatological (1982-2020 period) averaged gridded sea surface coastal pCO<sub>2</sub> (µatm) from the SOCATv2022 database used as an independent dataset against for which the reconstructed coastal pCO<sub>2</sub>-product is evaluated (SOCAT\_b).**

15

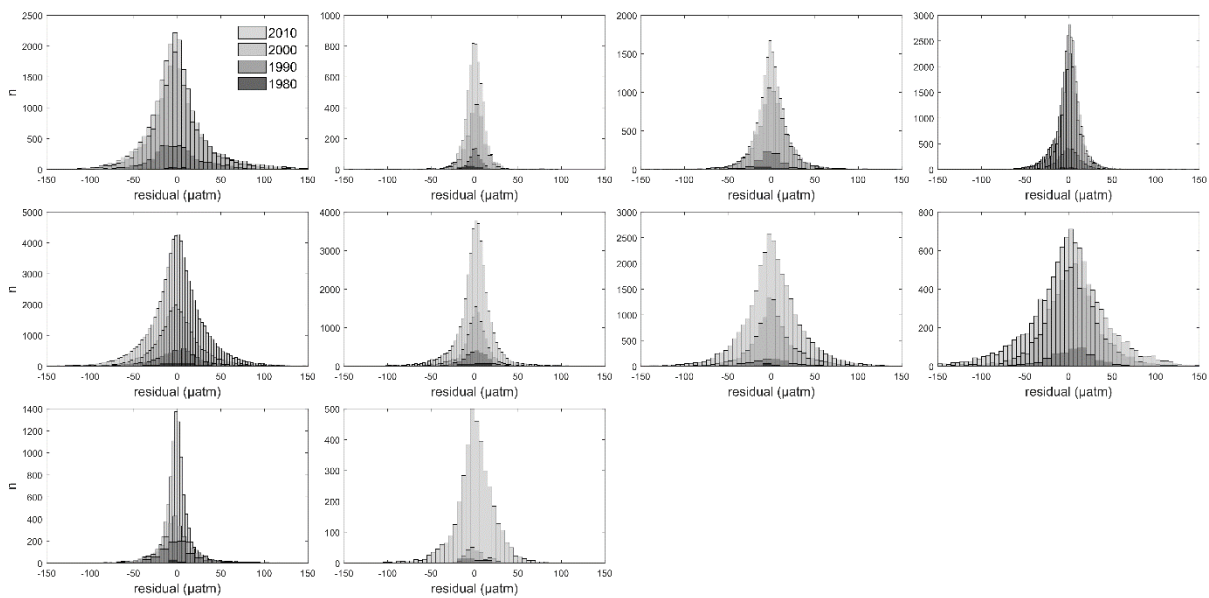

20 **Figure S2: Histograms of the residuals (in  $\mu\text{atm}$ ) between the reconstructed coastal  $\text{pCO}_2$ -product and SOCAT\_b for each of the four decades in each biogeochemical province.**

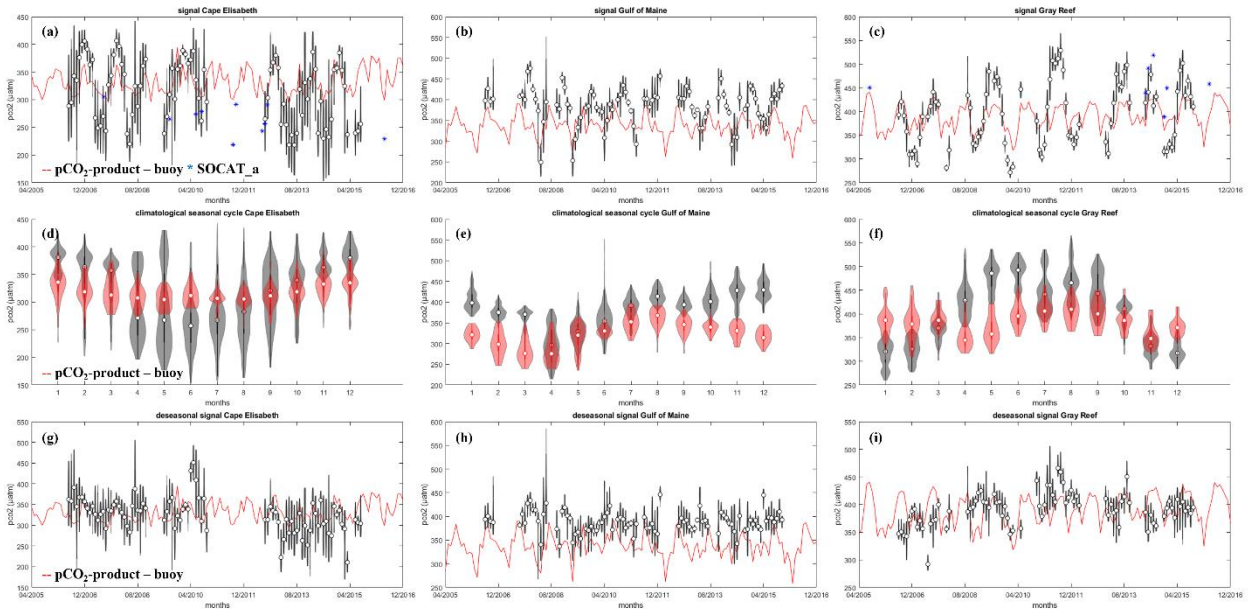

**Figure S3.** Comparison between the reconstructed coastal  $p\text{CO}_2$ -product (red) against times series from 3 coastal buoys (black) namely in Cape Elizabeth (NDBC Buoy 46041), in Gray’s Reef (NDBC Buoy 41008) and in the Gulf of Maine (Coastal Western Gulf of Maine mooring, Sutton et al., 2019). (a-c) Monthly time series, (d-f) climatological mean seasonal cycles, (g-i) linear trends from deseasonalized data. The violins for the buoys represent the intra variability on the  $p\text{CO}_2$  measurements. The violins in panels (d) to (g) for the reconstructed  $p\text{CO}_2$  represent the  $p\text{CO}_2$  variability of the month  $x$  around its monthly climatological  $p\text{CO}_2$  mean.

25
